# Supplementary material for: Tuning the Ni site location of bifunctional Ni-based catalysts for improving the performance in ethylene oligomerization
Source: Royal Society of Chemistry journal article supplement (doi:10.1039/d2nj01527g), 2022-01-01
Supplement: d2nj01527g1.pdf [file d2nj01527g1.pdf]

## SUPPORT INFORMATION

### **Tuning the Ni site location of bifunctional Ni-based catalysts for improving the performance on ethylene oligomerization**

Wanting Li,<sup>a,b</sup> Cunhui Zhou,<sup>a</sup> Wenqian Li,<sup>a,b</sup> Lixia Ge,<sup>a,b</sup> Gan Yu,<sup>a,b</sup> Minghuang Qiu,<sup>a</sup> Xinqing Chen<sup>\*a,b</sup>

<sup>a</sup> *CAS Key Laboratory of Low-carbon Conversion Science and Engineering, Shanghai Advanced Research Institute, Chinese Academy of Sciences, Shanghai 201210, China*

<sup>b</sup> *University of Chinese Academy of Sciences, Beijing 100049, China*

\*Corresponding author.

*E-mail address:* chenxq@sari.ac.cn (Xinqing Chen)

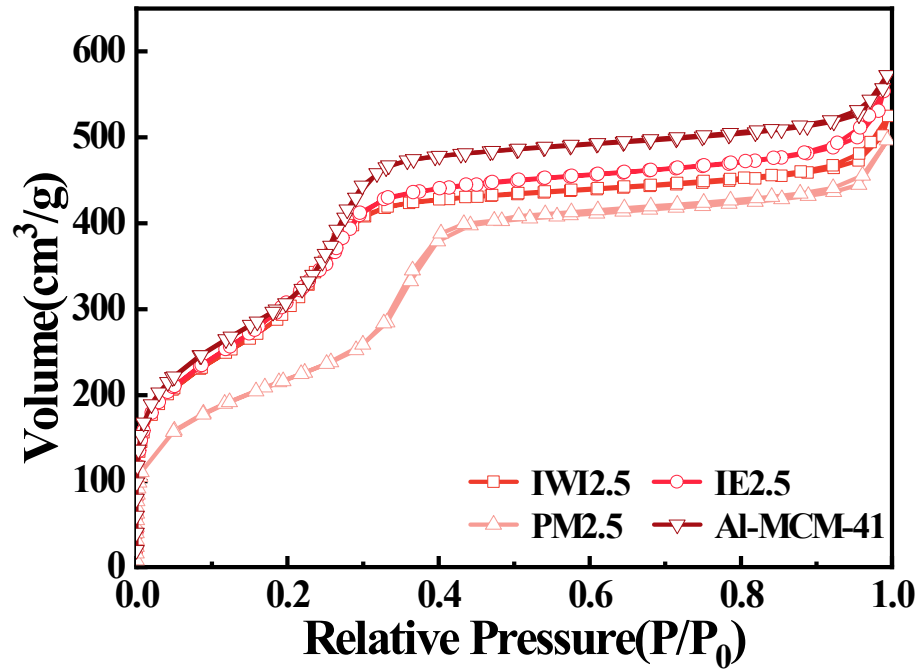

Figure S1. N<sub>2</sub> adsorption and desorption isotherms of Al-MCM-41-15 support and different Ni positioning catalysts.

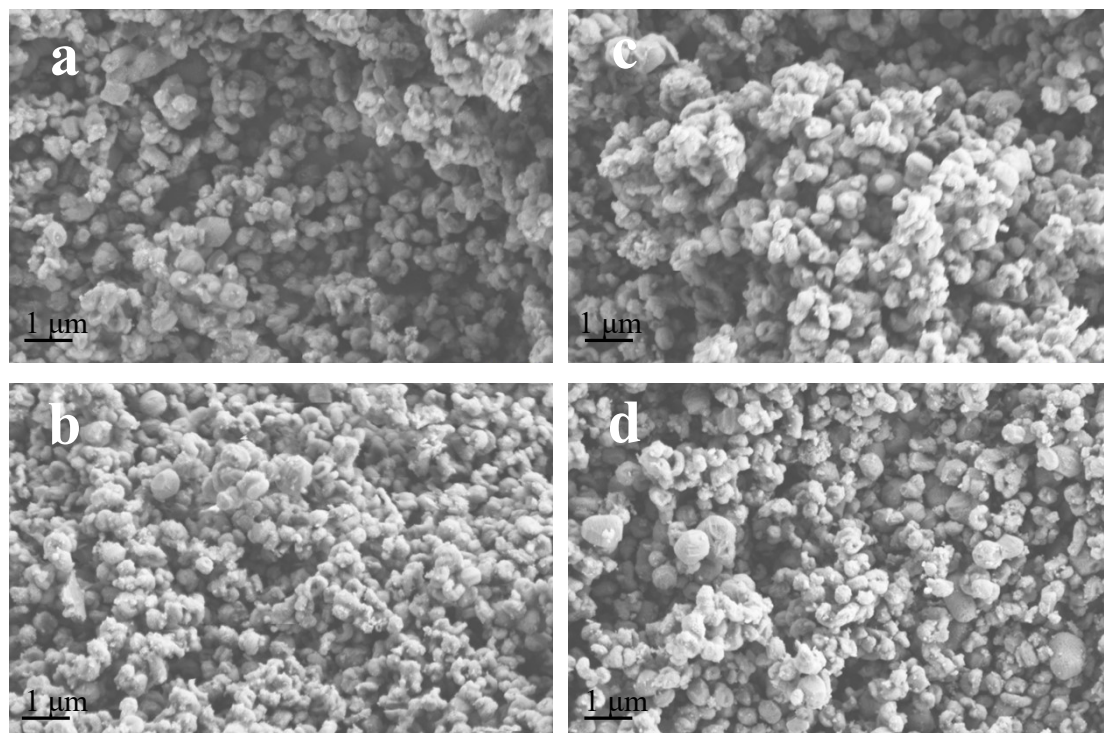

**Figure S2. SEM image of Al-MCM-41-15 support and different nickel positioning catalysts.**

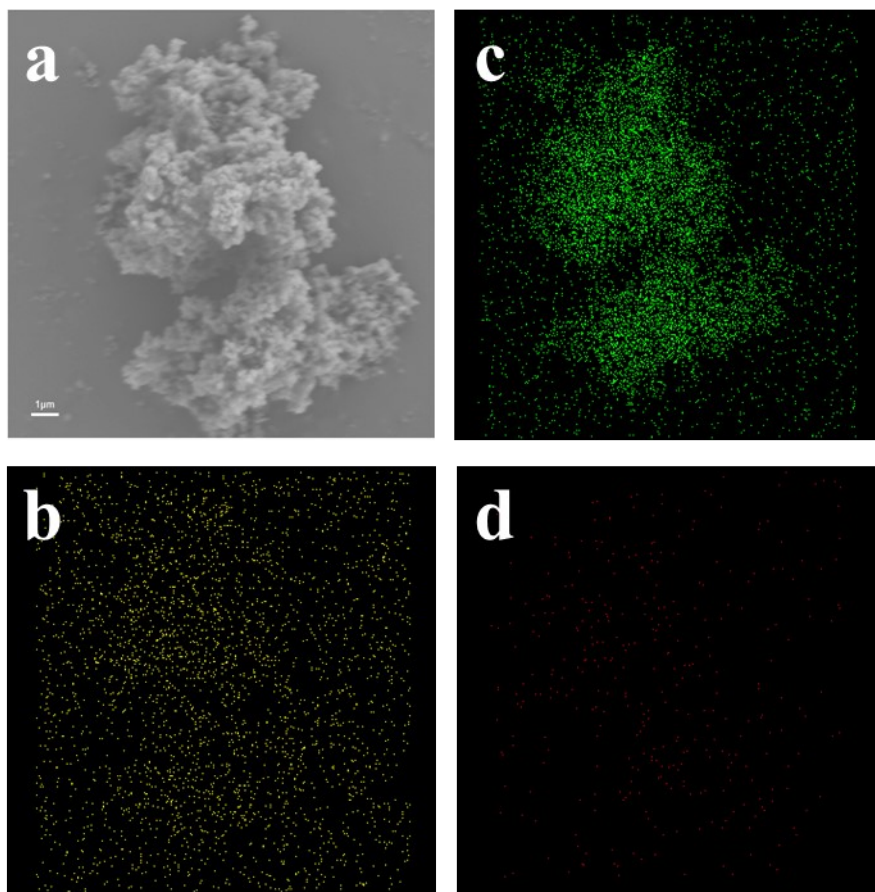

**Figure S3. EDS image of Al (b), Si (c), and Ni (d) on the surface of Al-MCM-41 (a) in IWI-2.5% catalyst.**

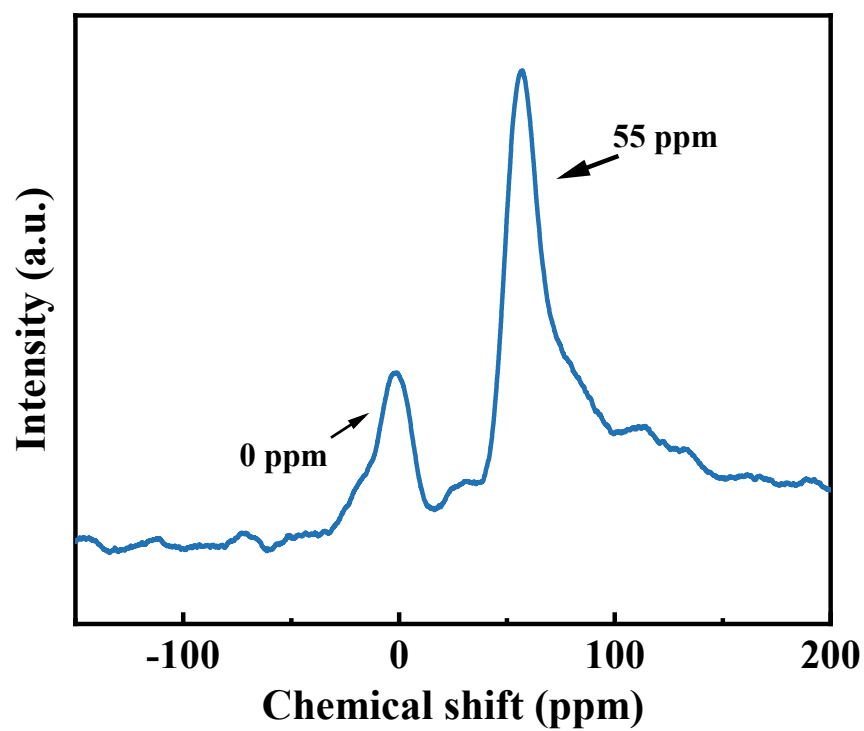

Figure S4.  $^{27}\text{Al}$  MAS-NMR spectra of Al-MCM-41-15 support.

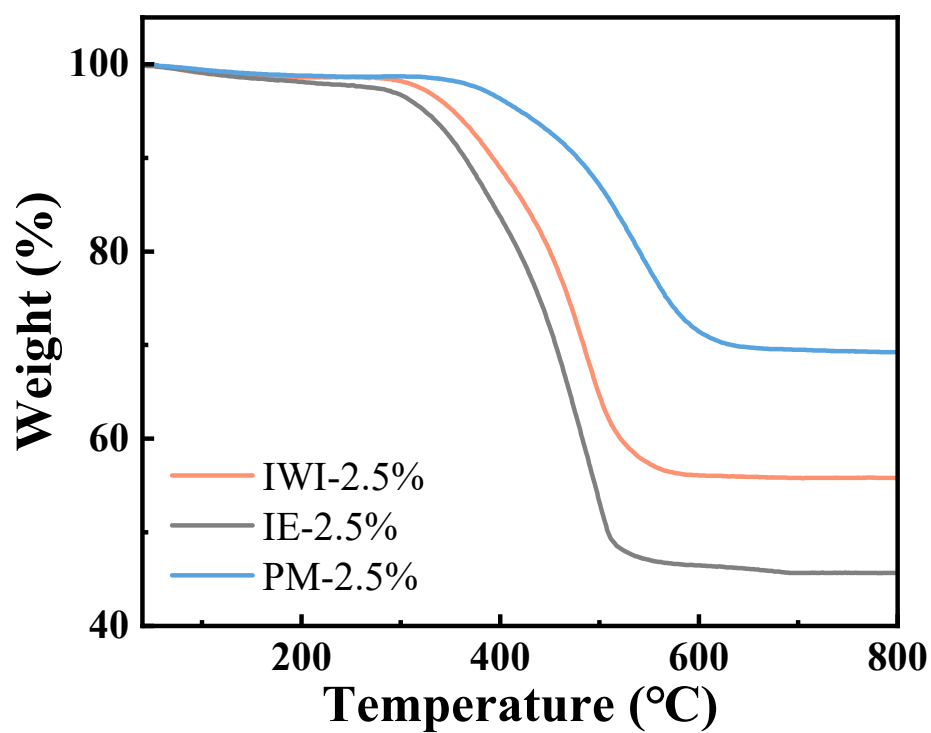

Figure S5. Thermogravimetric curves for different nickel positioning catalysts.

**Table S1. Acid site distribution of Al-MCM-41-15 support and different nickel positioning catalysts ( $\mu\text{mol g}^{-1}$ )**

| Sample       | B      | L      | Bs     | Ls     | B+L    | Bs+Ls  |
|--------------|--------|--------|--------|--------|--------|--------|
|              | 250 °C | 250 °C | 300 °C | 300 °C | 250 °C | 300 °C |
| IWI-2.5%     | 39     | 175    | 36     | 134    | 214    | 170    |
| IE-2.5%      | 60     | 199    | 46     | 177    | 259    | 216    |
| PM-2.5%      | 41     | 120    | 39     | 76     | 161    | 115    |
| Al-MCM-41-15 | 70     | 103    | 53     | 90     | 173    | 143    |

**Table S2. The influence of different catalysts on ethylene oligomerization**

| Catalyst     | Conversion | Oligomers(wt%) |                |                |                 |                 |       |
|--------------|------------|----------------|----------------|----------------|-----------------|-----------------|-------|
|              |            | C <sub>4</sub> | C <sub>6</sub> | C <sub>8</sub> | C <sub>10</sub> | C <sub>12</sub> | Other |
| IWI-2.5%     | 93.1       | 33.2           | 27.4           | 19.0           | 9.2             | 4.1             | 7.1   |
| IE-2.5%      | 92.8       | 31.9           | 27.9           | 17.6           | 9.0             | 3.6             | 10.0  |
| PM-2.5%      | 69.4       | 52.3           | 24.6           | 10.0           | 3.8             | 1.6             | 7.7   |
| Al-MCM-41-15 | 4.2        | 70.2           | 15.6           | 0.0            | 0.0             | 0.0             | 14.2  |



**Table S3. Effect of the residence time and the pressure on the ethylene conversion and oligomer distribution**

| Pressure<br>(MPa) | WHSV<br>(h <sup>-1</sup> ) | Conversion | Oligomers(wt%) |                |                |                 |                 |       |
|-------------------|----------------------------|------------|----------------|----------------|----------------|-----------------|-----------------|-------|
|                   |                            |            | C <sub>4</sub> | C <sub>6</sub> | C <sub>8</sub> | C <sub>10</sub> | C <sub>12</sub> | Other |
| 3                 | 5.0                        | 32.3       | 68.7           | 14.6           | 5.6            | 1.7             | 0.0             | 9.4   |
| 3                 | 4.0                        | 50.8       | 58.2           | 20.5           | 9.7            | 3.8             | 0.0             | 7.8   |
| 3                 | 3.0                        | 72.6       | 43.6           | 24.1           | 16.3           | 5.3             | 2.4             | 8.3   |
| 3                 | 2.0                        | 93.1       | 33.2           | 27.4           | 19.0           | 9.2             | 4.1             | 7.1   |
| 1                 | 2.0                        | 53.2       | 74.6           | 13.0           | 2.3            | 1.5             | 0.0             | 8.6   |
| 2                 | 2.0                        | 87.9       | 53.4           | 23.2           | 10.4           | 4.2             | 1.3             | 7.5   |
| 4                 | 2.0                        | 95.3       | 31.2           | 30.6           | 20.6           | 6.0             | 4.8             | 6.8   |
